# Supplementary material for: Therapeutic strategies and predictive models for Xp11.2 translocation/TFE3 gene fusion renal cell carcinoma in adults based on data of two Chinese medical centers
Source: publisher site journal article supplement (doi:10.18632/aging.205452), 2024-01-22
Supplement: Supplementary file [file aging-v16i2-205452-supplementary-material-SD1.pdf]

## SUPPLEMENTARY TABLES

**Supplementary Table 1. Grouping criteria.**

|                          | Low-group | Standard group | High-group |
|--------------------------|-----------|----------------|------------|
| BMI (kg/m <sup>2</sup> ) | –         | <24.00         | ≥24.00     |
| Mon (10 <sup>9</sup> /L) | –         | <0.6           | ≥0.6       |
| Bas (10 <sup>9</sup> /L) | –         | <0.06          | ≥0.06      |
| Eos(10 <sup>9</sup> /L)  | ≤0.4      | >0.4           | –          |
| Fib (g/L)                | –         | <4             | ≥4         |
| D-Dimer (ug/L)           | –         | <550           | ≥550       |
| ALB(g/L)                 | ≤40.00    | >40            |            |
| ALT(U/L)                 | –         | <40            | ≥40        |
| AST(U/L)                 | –         | <35            | ≥35        |
| AUT (U/L)                | –         | <45            | ≥45        |
| BA (umol/L)              | –         | <15.00         | ≥15.00     |
| GLU (umol/L)             | –         | <6.16          | ≥6.16      |
| BUN (mmol/L)             | –         | <8.80          | ≥8.80      |
| UA (umol/L)              | –         | <357.00        | ≥357.00    |
| TC (mmol/L)              | –         | <5.96          | ≥5.96      |
| TG (mmol/L)              | –         | <1.70          | ≥1.70      |
| HDL (mmol/L)             | ≤1.10     | >1.10          | –          |
| LDL (mmol/L)             | –         | <3.10          | ≥3.10      |
| LDH (U/L)                | –         | <250.00        | ≥250.00    |

Grouping criteria for each variable.

**Supplementary Table 2. Binary logistic regression analysis.**

| 0               | B       | SE       | Wald   | df | p     | EXP   | 95% CI |       |
|-----------------|---------|----------|--------|----|-------|-------|--------|-------|
|                 |         |          |        |    |       |       | Floor  | Upper |
| Age             | 1.669   | 0.275    | 36.817 | 1  | 0.000 | 5.305 | 3.095  | 9.095 |
| Sex             | –0.574  | 0.251    | 5.242  | 1  | 0.022 | 0.563 | 0.345  | 0.921 |
| Diabetes        | –0.530  | 0.471    | 1.265  | 1  | 0.261 | 0.589 | 0.234  | 1.482 |
| Hypertension    | –0.418  | 0.264    | 2.510  | 1  | 0.113 | 0.659 | 0.393  | 1.104 |
| Cardiac disease | –0.673  | 0.726    | 0.858  | 1  | 0.354 | 0.510 | 0.123  | 2.119 |
| Alcoholism      | –0.414  | 0.285    | 2.113  | 1  | 0.146 | 0.661 | 0.378  | 1.155 |
| Smoking         | 1.047   | 0.250    | 17.531 | 1  | 0.000 | 2.849 | 1.745  | 4.650 |
| BMI             | 0.108   | 0.039    | 7.661  | 1  | 0.006 | 1.114 | 1.032  | 1.202 |
| Bas             | –0.145  | 0.602    | 0.058  | 1  | 0.809 | 0.865 | 0.266  | 2.815 |
| Eos             | 1.166   | 0.399    | 8.542  | 1  | 0.003 | 3.208 | 1.468  | 7.009 |
| Fib             | 0.492   | 0.353    | 1.942  | 1  | 0.163 | 1.636 | 0.819  | 3.269 |
| D-Dimer         | 0.471   | 0.252    | 3.506  | 1  | 0.061 | 1.602 | 0.978  | 2.622 |
| ALB             | 0.156   | 0.250    | 0.391  | 1  | 0.532 | 1.169 | 0.717  | 1.906 |
| ALT             | –0.491  | 0.471    | 1.084  | 1  | 0.298 | 0.612 | 0.243  | 1.542 |
| AST             | –0.413  | 0.405    | 1.040  | 1  | 0.308 | 0.661 | 0.299  | 1.464 |
| GGT             | –0.050  | 0.306    | 0.026  | 1  | 0.871 | 0.952 | 0.522  | 1.733 |
| BA              | –18.174 | 4641.084 | 0.000  | 1  | 0.997 | 0.000 | 0.000  | 0.000 |
| GLU             | 0.066   | 0.299    | 0.049  | 1  | 0.825 | 1.068 | 0.595  | 1.918 |

|     |        |       |       |   |       |       |       |       |
|-----|--------|-------|-------|---|-------|-------|-------|-------|
| BUN | -0.743 | 0.404 | 3.376 | 1 | 0.066 | 0.476 | 0.216 | 1.051 |
| UA  | -0.041 | 0.247 | 0.028 | 1 | 0.867 | 0.960 | 0.592 | 1.557 |
| TC  | -0.012 | 0.408 | 0.001 | 1 | 0.977 | 0.988 | 0.444 | 2.197 |
| TG  | 0.260  | 0.262 | 0.985 | 1 | 0.321 | 1.297 | 0.776 | 2.166 |
| HDL | 0.250  | 0.246 | 1.028 | 1 | 0.311 | 1.284 | 0.792 | 2.081 |
| LDL | 0.754  | 0.247 | 9.319 | 1 | 0.002 | 2.126 | 1.310 | 3.452 |
| LDH | 0.300  | 0.440 | 0.465 | 1 | 0.495 | 1.350 | 0.570 | 3.195 |

---

The result of each variable in the logistic regression analysis.
